# Supplementary material for: Amino Acid Substitutions and Differential Gene Expression of Outer Membrane Proteins in Adherent-Invasive Escherichia coli
Source: Front Microbiol. 2019 Aug 6;10:1707. doi: 10.3389/fmicb.2019.01707 (PMC6691688; doi:10.3389/fmicb.2019.01707)
Supplement: Supplementary file 6 [file Table_4.XLSX]

## Sheet: S4
Supplementary Table 4. Distribution of OmpC amino acid substitutions among the strain collection. Number of strains in each variant and pathotype are indicated.
1Gene sequences retrieved from NCBI.
Variant	Amino acid position
LF82	24	25	28	31	38	47	48	49	50	54	57	85	86	88	89	90	91	92	117	110	138	150	166	174	177	178	179	182	183	184	185	186	187	188	189	191	193	197	198	199	200	201	214	220	222	224	231	232	235
	V	Y	D	K	V	N	K	S	E	Q	M	A	P	(absent)	S	E	N	N	I	F	G	F	N	Q	S	V	S	N	D	P	D	F	T	G	H	I	N	K	(absent)	A	L	R	D	V	A	V	W	D	N
Variant 1 (n=4)
Variant 2 (n=7)						D			V			S	A		N				V					K				-	-	-	-	-	-	-	-	M		G						I	G	I	D		S
Variant 3 (n=4)								D	V			S	A		N				V					K				-	-	-	-	-	-	-	-	M		G						I	G	I	D		S
Variant 4 (n=1)								D	V			S	A		N				V					K				-	-	-	-	-	-	-	-	M		E						I			D		S
Variant 5 (n=2)						D			V			S	A		N				V					K				-	-	-	-	-	-	-	-	M		E						I			D		S
Variant 6 (n=3)								D	V			S	A		N				V					K				-	-	-	-	-	-	-	-	M		D						I			D	A	T
Variant 7 (n=1)						D			V																																						D	A	T
Variant 8 (n=1)						D			V			S	A		N				V					K				-	-	-	-	-	-	-	-	M		D						I	G	I	D	A	T
Variant 9 (n=5)								D	V			S	A		N				V					K	N	P		G	-	-	-	-	F	T	G	V		D						I	G	I	D	A	T
Variant 10 (n=1)		F	G					D	V			S	A		N				V					K	N	P		G	-	-	-	-	F	T	S	V		D						I	G	I	D	A	T
Variant 11 (n=3)						D			V			S	A		N				V					K			D	-	-	-	-	-	-	-	-	M		G						I			D		G
Variant 12 (n=1)						D			V			S	A		N				V					K			D	-	-	-	-	-	-	-	-	M		G						I			D	A	G
Variant 13 (n=1)						D			V			S	A		N				V					K			D	-	-	-	-	-	-	-	-	M		G						I			D	A	G
Variant 14 (n=1)												S	A		N				V					K			D	-	-	-	-	-	-	-	-	M		G						I			D		F
Variant 15 (n=1)											V	T	S	D	N	K	E		V					K				-	-	-	-	-	-	-	-	M		G						I			D		G
Variant 16 (n=1)											V	T	S	D	N	K	E		V			Y		K				-	-	-	-	-	-	-	-	M		G						I			D		F
Variant 17 (n=1)											V	T	S	A	N	K	E		V			Y		K				-	-	-	-	-	-	-	-	M		G						I			D		F
Variant 18 (n=1)								-			V	T	S	D	N	K	E		V			Y		K				-	-	-	-	-	-	-	-	M		G						I			D		F
Variant 19 (n=1)											V	T	S	D	N	K	E		V					K				-	-	-	-	-	-	-	-	M		G						I			D	A	T
Variant 20 (n=1)											V	T	S	D	N	K	E		V					K				-	-	-	-	-	-	-	-	M		D						I			D	A	T
Variant 21 (n=1)								D	V			S	A		N					I				T				-	-	-	-	-	-	-	-	D	Q	G						I	G	I
Variant 22 (n=2)						D			V											I																								I	G	I
Variant 23 (n=12)						D			V
Variant 24 (n=1)					I	D			V
Variant 25 (n=1)	I						D		K	K		E				D		S	V		D		D	K		A	H	-	-	-	-	-	-	-	-	M	T	D	D	V	F	E	N	I
[truncated: 12 more columns]
