# Supplementary material for: Amino Acid Substitutions and Differential Gene Expression of Outer Membrane Proteins in Adherent-Invasive Escherichia coli
Source: Front Microbiol. 2019 Aug 6;10:1707. doi: 10.3389/fmicb.2019.01707 (PMC6691688; doi:10.3389/fmicb.2019.01707)
Supplement: Supplementary file 9 [file Table_7.xlsx]

## Sheet: S7
Supplementary Table 7. Gene expression according to the phylogenetic origin of the strains. The atypical non-AIEC strain was discarded. Gene expression values are given in log10RTA1.
1RTA=Efficiency ^(Ct target gene reference strain – Ct target gene sample) / Efficiency ^(Ct constitutive gene reference strain – Ct constitutive gene sample). 2 SN condition = bacteria growing in suspension . 3A/I condition = bacteria adhering and invading intestinal epithelial cells.
			OmpA			OmpC			OmpF
	Phylogroup	n	mean	desv	p-value	mean	desv	p-value	mean	desv	p-value
SN2	A	7	-0.3991	0.17631	0.712	-0.2399	0.23613	0.026	-0.3034	0.22424	0.249
	B1	5	-0.0854	0.04432		0.2795	0.14576		0.1318	0.09444
	B2	21	-0.3637	0.13691		-0.5165	0.13163		-0.3572	0.13253
	D	5	-0.1873	0.11461		0.0971	0.24534		0.0783	0.20419
A/I3	A	7	0.0701	0.0969	0.51	0.0391	0.23979	0.023	0.0513	0.20191	0.485
	B1	5	-0.0804	0.15351		0.377	0.08157		0.2602	0.15235
	B2	23	0.1119	0.06392		-0.1962	0.09854		-0.0057	0.09429
	D	5	0.0731	0.02558		0.2338	0.10372		0.1236	0.15627
